# Supplementary material
Source: PubMed Central journal article supplement (PMC5157118)
Supplement: supp_gzw065_Figure-support.pdf [file supp_gzw065_Figure-support.pdf]

Fig. S1

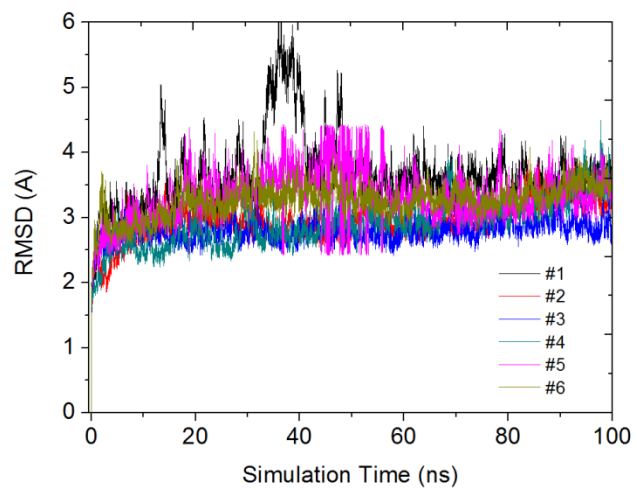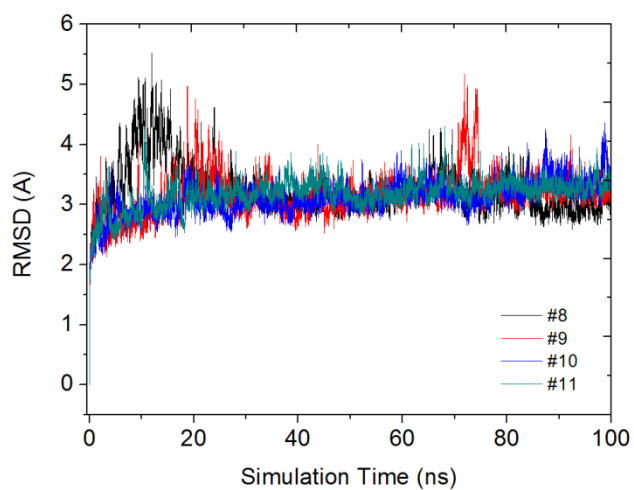

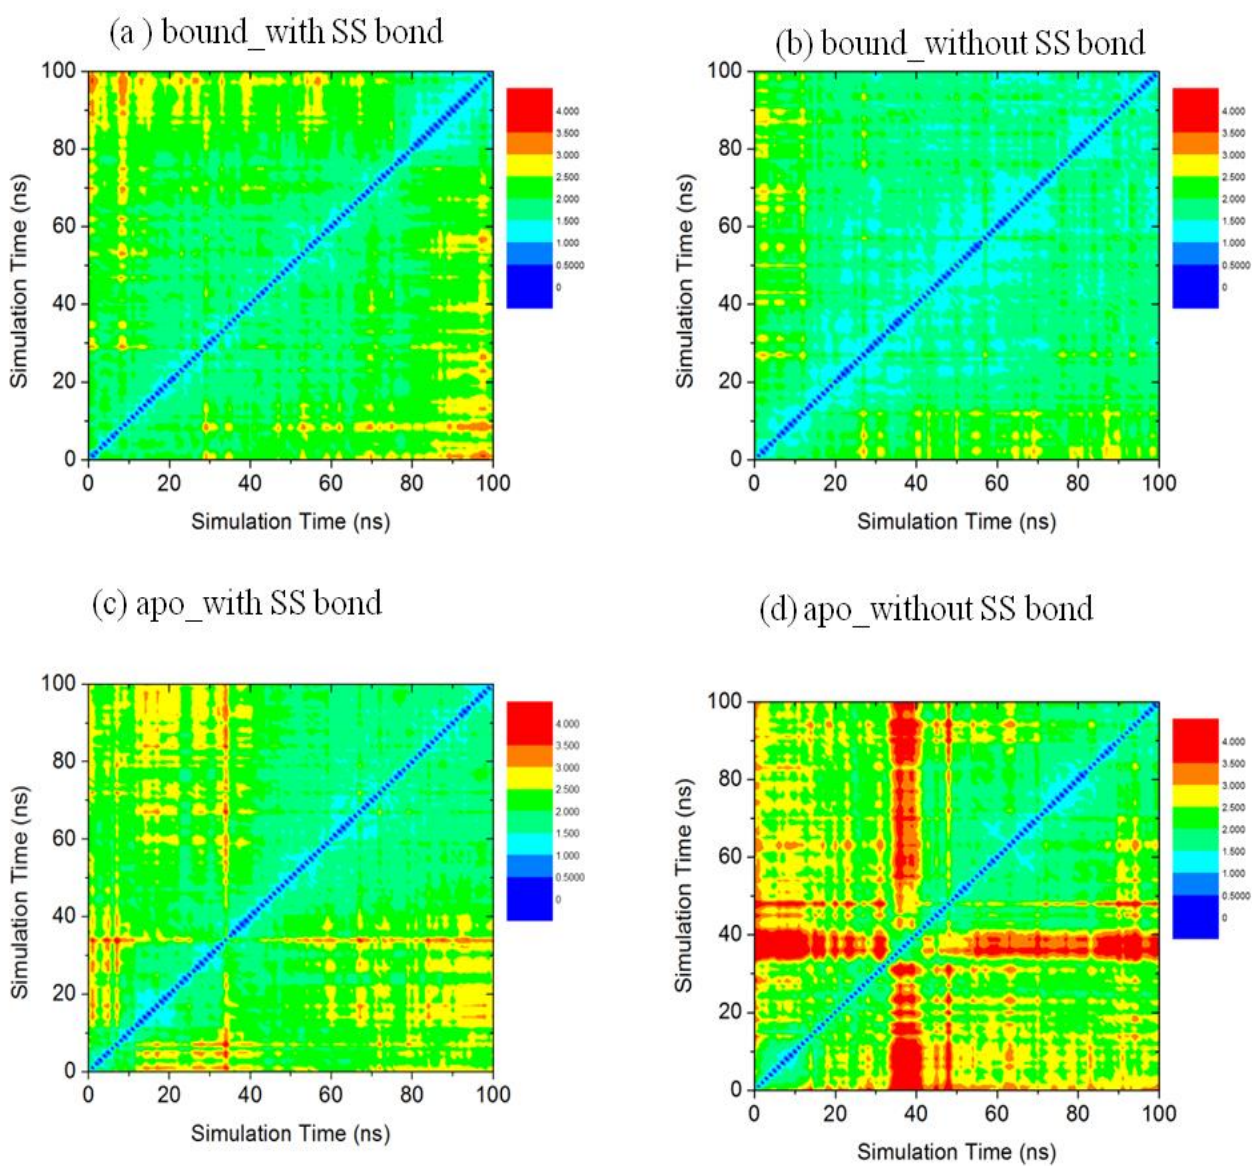

Fig. S2. 2-D RMSDs during the 100ns MD simulation

Fig. S3

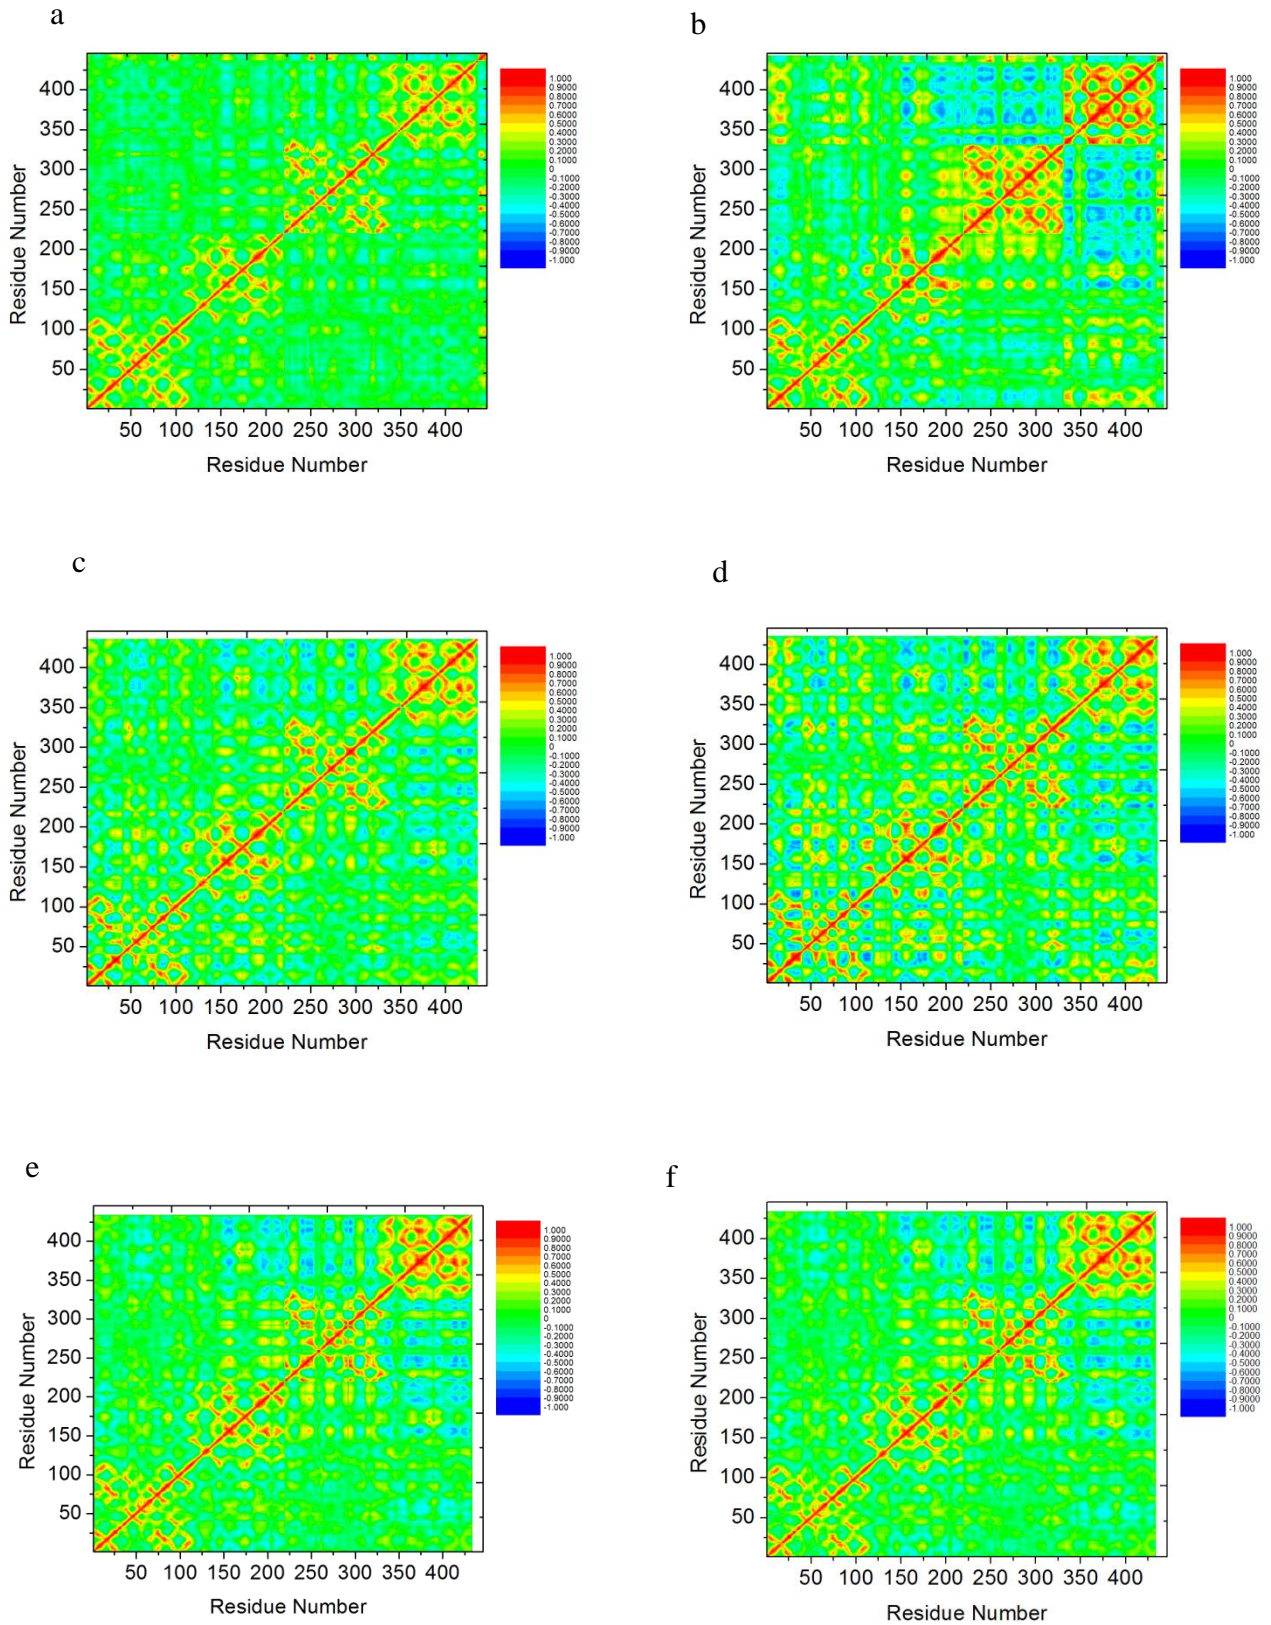



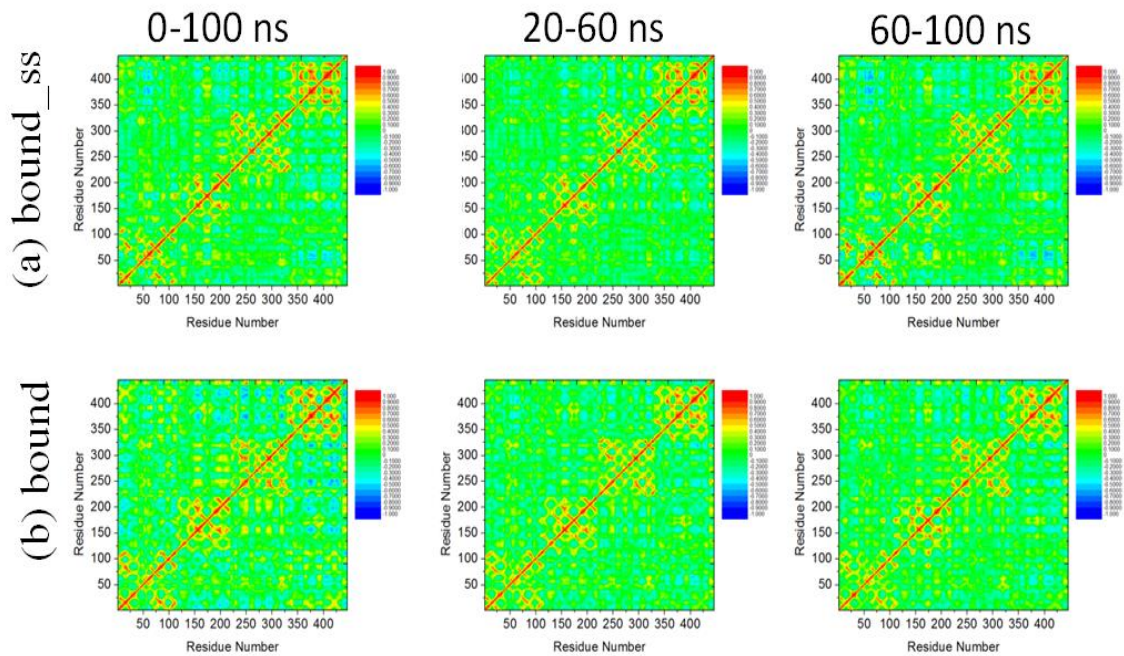

Fig. S4. Motion correlation among the Fab sub-domains in the time frame of 0-100ns, 20-60 ns and 60-100 ns

0-100

P-Met442

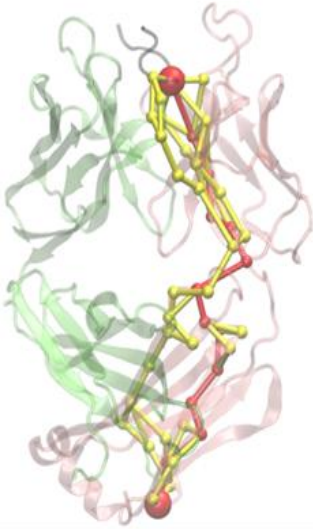

L-Asp156

20-60

P-Met442

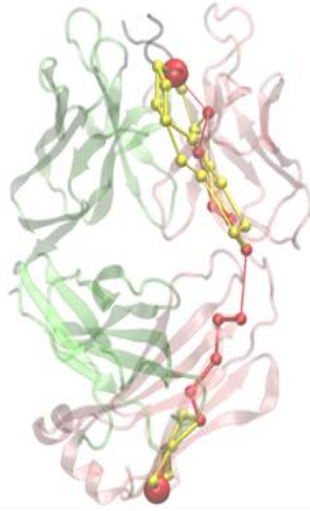

L-Asp156

60-100

P-Met442

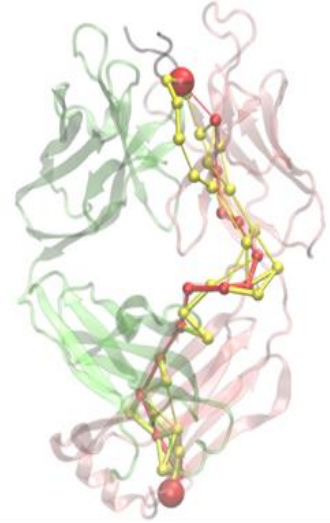

L-Asp156

Fig. S5. Network analysis and flow properties from Met442 of peptide and Asp156 of light chain (the bound form without inter-SS bond) in the time frame of 0-100ns, 20-60 ns and 60-100 ns
